# Supplementary material for: Positive Interaction between H2O2 and Ca2+ Mediates Melatonin-Induced CBF Pathway and Cold Tolerance in Watermelon (Citrullus lanatus L.)
Source: MDPI journal article supplement (doi:10.3390/antiox10091457), 2021-09-14
Supplement: s1 [file s1]

**Table S1** Gene-specific primers used for qRT-PCR analysis.

| Gene                            | Accession number       | Forward primer          | Reverse primer          |
|---------------------------------|------------------------|-------------------------|-------------------------|
| <i><math>\beta</math>-actin</i> | <i>Cla97C02G026960</i> | CCATGTATGTTGCCATCCAG    | GGATAGCATGGGGTAGAGCA    |
| <i>ClRBOHD</i>                  | <i>Cla97C10G195960</i> | ACGAGGTAGCGGAAATGGACGA  | GCATTGCTATCAACGCCGACCT  |
| <i>ClCBF1</i>                   | <i>Cla97C01G005910</i> | ATATACAGAGGGCTGCGGCTCA  | CCAAACAACGCCTCCTCATCCA  |
| <i>ClCOR47</i>                  | <i>Cla97C08G152370</i> | TGGCGGAGTACGAGAACAAGAA  | TCAGTAACGACGACCACCTCCT  |
| <i>ClERD10</i>                  | <i>Cla97C08G152370</i> | AGGAGGTGGTCGTCGTTACTGA  | TGCTATCGGATCGGGTGAGCTT  |
| <i>ClKIN1</i>                   | <i>Cla97C01G004600</i> | AGGGTCAAGCACAGGAGAAAGC  | CCAGTGGCATCCTTGACAGCAT  |
| <i>AtActin2</i>                 | <i>AT3G18780</i>       | GGTAACATTGTGCTCAGTGGTGG | AACGACCTTAATCTTCATGCTGC |
| <i>AtCBF1</i>                   | <i>AT4G25490</i>       | GCATGTCTCAACTTCGCTGA    | ATCGTCTCCTCCATGTCCAG    |
| <i>AtCOR47</i>                  | <i>AT1G20440</i>       | ACGGTCGCAACAGAGGAATCAC  | GAGCGTCGTTGTCTCTTGAGGT  |
| <i>AtERD10</i>                  | <i>AT5G15960</i>       | AATGCCTTCCAAGCCGGTCAGA  | CTGCCGCATCCGATACACTCTT  |
| <i>AtKIN1</i>                   | <i>AT1G20450</i>       | GCCACAGCAAGAAACCAGAGGA  | TCTCCAGTGGTCTTGCGTGAT   |
